# Supplementary material
Source: PubMed Central journal article supplement (PMC5024328)
Supplement: ct6b00422_si_001.pdf [file ct6b00422_si_001.pdf]

# Supporting Information

## Enthalpic and Entropic Contributions to Hydrophobicity

*Michael Schauperl<sup>†</sup>, Maren Podewitz<sup>†</sup>, Birgit J. Waldner<sup>†</sup> and Klaus R. Liedl<sup>†\*</sup>*

<sup>†</sup> Institute of General, Inorganic and Theoretical Chemistry, and Center for Molecular Biosciences Innsbruck (CMBI), University of Innsbruck, Innrain 80-82, A-6020 Innsbruck, Tyrol, Austria

\*klaus.liedl@uibk.ac.at

### **Further decomposition of calculated thermodynamic properties**

As outlined in the methodology section total solvation free energies, enthalpies, and entropies, these thermodynamic values are further decomposed. According to Eq. (3), the total enthalpy  $\Delta H_{\text{Solv}}$  can be split into the enthalpic interactions between the solute and the water  $\Delta H_{\text{SW}}$  and an enthalpy term describing the distortion of the water-water interactions  $\Delta H_{\text{WW}}$ . The total entropy  $\Delta S_{\text{Solv}}$  is split into an orientational  $\Delta S_{\text{orient}}$  and a translational term  $\Delta S_{\text{trans}}$  (compare Eq. (4)). The origin of these terms is explained in the methods section of the main text.

**Table S1:** Decomposition of the thermodynamic properties for the TIP3P water model.

| Amino Acid | $\Delta H_{\text{SW}}$ | $\Delta H_{\text{WW}}$ | $\Delta H_{\text{Solv}}$ | $-\Delta S_{\text{orient}}$ | $-\Delta S_{\text{trans}}$ | $-\Delta S_{\text{Solv}}$ | $\Delta G_{\text{Solv}}$ |
|------------|------------------------|------------------------|--------------------------|-----------------------------|----------------------------|---------------------------|--------------------------|
| ALA        | -43.2±1.8              | 20.6±1.0               | -22.5±0.8                | 9.5±0.0                     | 5.3±0.1                    | 14.8±0.1                  | -7.7±0.7                 |
| ARG(+)     | -121.9±4.2             | 57.2±2.1               | -64.7±2.1                | 14.7±0.3                    | 9.3±0.2                    | 24.1±0.5                  | -40.7±1.6                |
| ASN        | -63.5±7.0              | 29.7±3.0               | -33.8±4.0                | 12.2±0.6                    | 6.9±0.3                    | 19.1±0.9                  | -14.7±3.2                |
| ASP(-)     | -141.8±0.7             | 61.2±0.4               | -80.5±0.3                | 18.2±0.1                    | 8.2±0.1                    | 26.4±0.0                  | -54.2±0.3                |
| CYS        | -46.8±3.5              | 22.9±1.5               | -23.9±2.0                | 9.6±0.2                     | 5.7±0.2                    | 15.3±0.4                  | -8.5±1.7                 |
| GLN        | -68.1±2.5              | 32.3±1.4               | -35.8±1.1                | 13.2±0.2                    | 7.4±0.2                    | 20.6±0.4                  | -15.2±0.7                |
| GLU(-)     | -137.6±3.4             | 59.3±1.5               | -78.3±1.9                | 19.0±0.0                    | 8.7±0.2                    | 27.7±0.2                  | -50.6±1.7                |
| GLY        | -42.9±1.1              | 20.5±0.7               | -22.4±0.4                | 8.9±0.0                     | 5.2±0.0                    | 14.0±0.1                  | -8.4±0.4                 |
| HIS        | -67.6±1.2              | 31.6±0.3               | -36.0±1.0                | 13.5±0.2                    | 7.6±0.0                    | 21.1±0.2                  | -14.9±0.8                |
| HIS(+)     | -108.5±3.9             | 50.9±2.3               | -57.7±1.6                | 13.2±0.3                    | 8.3±0.1                    | 21.5±0.3                  | -36.2±1.3                |
| ILE        | -49.7±0.5              | 24.2±0.2               | -25.4±0.5                | 11.3±0.0                    | 6.8±0.1                    | 18.1±0.1                  | -7.3±0.6                 |
| LEU        | -49.0±1.2              | 24.1±0.5               | -24.9±0.7                | 11.2±0.2                    | 6.6±0.1                    | 17.8±0.3                  | -7.1±0.5                 |
| LYS(+)     | -126.6±4.5             | 60.5±2.0               | -66.1±2.5                | 14.3±0.3                    | 8.5±0.5                    | 22.8±0.7                  | -43.4±1.9                |
| MET        | -54.1±0.6              | 26.5±0.5               | -27.6±0.6                | 11.4±0.1                    | 6.7±0.0                    | 18.1±0.1                  | -9.5±0.5                 |
| PHE        | -57.9±0.2              | 28.8±0.3               | -29.1±0.1                | 12.6±0.0                    | 7.3±0.1                    | 19.9±0.2                  | -9.2±0.1                 |
| PRO        | -43.6±1.6              | 20.7±0.8               | -22.9±0.8                | 10.2±0.1                    | 5.8±0.0                    | 16.0±0.2                  | -6.9±0.6                 |
| SER        | -52.5±2.2              | 24.5±1.0               | -28.0±1.2                | 9.8±0.1                     | 5.8±0.0                    | 15.6±0.1                  | -12.4±1.1                |
| THR        | -51.7±2.0              | 24.6±1.0               | -27.1±1.1                | 10.6±0.2                    | 6.2±0.2                    | 16.7±0.4                  | -10.3±0.9                |
| TRP        | -65.5±1.0              | 31.7±0.6               | -33.8±0.5                | 14.1±0.1                    | 8.3±0.1                    | 22.3±0.2                  | -11.5±0.4                |
| TYR        | -63.1±3.6              | 30.7±1.5               | -32.4±2.1                | 12.5±0.2                    | 7.7±0.1                    | 20.2±0.3                  | -12.2±1.9                |
| VAL        | -47.5±1.4              | 23.0±0.6               | -24.5±0.8                | 10.8±0.1                    | 6.4±0.2                    | 17.2±0.3                  | -7.3±0.5                 |

**Table S2:** Decomposition of the thermodynamic properties for the TIP4P water model.

| Amino Acid | $\Delta H_{\text{SW}}$ | $\Delta H_{\text{WW}}$ | $\Delta H_{\text{Solv}}$ | $-\text{T}\Delta S_{\text{orient}}$ | $-\text{T}\Delta S_{\text{trans}}$ | $-\text{T}\Delta S_{\text{Solv}}$ | $\Delta G_{\text{Solv}}$ |
|------------|------------------------|------------------------|--------------------------|-------------------------------------|------------------------------------|-----------------------------------|--------------------------|
| ALA        | -46.5±1.1              | 24.4±0.6               | -22.0±0.5                | 10.3±0.1                            | 5.5±0.1                            | 15.8±0.2                          | -6.3±0.4                 |
| ARG(+)     | -127.8±1.6             | 65.0±1.1               | -62.8±0.5                | 15.5±0.1                            | 9.0±0.2                            | 24.5±0.3                          | -38.3±0.4                |
| ASN        | -68.3±5.6              | 34.8±2.5               | -33.5±3.1                | 13.4±0.5                            | 7.0±0.2                            | 20.4±0.7                          | -13.1±2.5                |
| ASP(-)     | -145.8±6.9             | 63.1±2.8               | -82.8±4.2                | 20.5±0.1                            | 8.7±0.1                            | 29.2±0.1                          | -53.5±4.1                |
| CYS        | -49.4±2.1              | 27.1±1.1               | -22.3±1.0                | 10.4±0.2                            | 5.9±0.1                            | 16.3±0.3                          | -6.0±0.8                 |
| GLN        | -70.7±2.0              | 36.0±1.1               | -34.7±0.8                | 14.2±0.1                            | 7.5±0.0                            | 21.7±0.1                          | -12.9±0.8                |
| GLU(-)     | -151.1±2.7             | 65.2±1.5               | -85.9±1.3                | 21.5±0.2                            | 9.2±0.1                            | 30.6±0.1                          | -55.2±1.1                |
| GLY        | -46.3±0.3              | 24.7±0.1               | -21.6±0.2                | 9.7±0.0                             | 5.1±0.0                            | 14.8±0.1                          | -6.8±0.2                 |
| HIS        | -71.6±2.2              | 37.1±1.2               | -34.5±1.2                | 14.6±0.3                            | 7.6±0.2                            | 22.2±0.4                          | -12.3±0.8                |
| HIS(+)     | -114.7±1.2             | 58.6±0.5               | -56.0±0.7                | 14.3±0.2                            | 8.2±0.0                            | 22.5±0.2                          | -33.5±0.7                |
| ILE        | -53.1±0.8              | 27.6±0.6               | -25.4±0.2                | 12.5±0.0                            | 7.2±0.2                            | 19.7±0.1                          | -5.7±0.2                 |
| LEU        | -53.4±0.8              | 28.5±0.9               | -24.9±0.1                | 12.4±0.1                            | 7.0±0.1                            | 19.4±0.2                          | -5.5±0.1                 |
| LYS(+)     | -129.3±1.6             | 66.3±1.0               | -63.0±0.9                | 15.1±0.2                            | 8.4±0.1                            | 23.5±0.2                          | -39.5±0.7                |
| MET        | -55.7±2.3              | 30.1±0.7               | -25.7±1.7                | 12.3±0.2                            | 7.1±0.2                            | 19.5±0.3                          | -6.2±1.4                 |
| PHE        | -55.8±3.8              | 30.6±1.7               | -25.2±2.2                | 13.4±0.2                            | 7.6±0.2                            | 20.9±0.4                          | -4.3±1.8                 |
| PRO        | -46.5±1.0              | 24.9±0.4               | -21.6±0.7                | 10.9±0.1                            | 5.8±0.1                            | 16.8±0.2                          | -4.8±0.5                 |
| SER        | -58.4±5.2              | 29.1±2.9               | -29.3±2.7                | 10.8±0.5                            | 5.8±0.3                            | 16.7±0.8                          | -12.7±2.0                |
| THR        | -55.7±0.9              | 28.6±0.8               | -27.1±0.2                | 11.5±0.1                            | 6.5±0.1                            | 18.0±0.2                          | -9.1±0.2                 |
| TRP        | -70.1±0.6              | 37.8±0.3               | -32.3±0.4                | 15.4±0.1                            | 8.5±0.1                            | 23.9±0.2                          | -8.4±0.3                 |
| TYR        | -67.5±1.1              | 36.3±0.7               | -31.3±0.8                | 13.8±0.3                            | 8.0±0.3                            | 21.9±0.6                          | -9.4±0.3                 |
| VAL        | -51.2±0.4              | 27.0±0.3               | -24.2±0.1                | 11.8±0.1                            | 6.6±0.0                            | 18.4±0.1                          | -5.8±0.1                 |

**Table S3:** Decomposition of the thermodynamic properties for the TIP5P water model.

| Amino Acid | $\Delta H_{SW}$ | $\Delta H_{WW}$ | $\Delta H_{Solv}$ | $-T\Delta S_{orient}$ | $-T\Delta S_{trans}$ | $-T\Delta S_{Solv}$ | $\Delta G_{Solv}$ |
|------------|-----------------|-----------------|-------------------|-----------------------|----------------------|---------------------|-------------------|
| ALA        | -41.0±0.9       | 19.7±0.2        | -21.3±0.7         | 9.8±0.1               | 6.0±0.1              | 15.8±0.2            | -5.5±0.5          |
| ARG(+)     | -129.1±2.4      | 57.0±0.6        | -72.1±1.9         | 18.1±0.4              | 11.3±0.2             | 29.4±0.6            | -42.8±1.5         |
| ASN        | -67.2±1.2       | 30.0±0.4        | -37.1±0.9         | 14.2±0.2              | 8.5±0.1              | 22.6±0.3            | -14.5±1.0         |
| ASP(-)     | -123.0±4.9      | 55.9±2.2        | -67.0±2.8         | 16.7±0.1              | 8.6±0.1              | 25.3±0.1            | -41.7±2.7         |
| CYS        | -47.5±3.6       | 23.3±1.7        | -24.2±1.9         | 9.9±0.1               | 6.2±0.1              | 16.1±0.1            | -8.1±1.8          |
| GLN        | -66.3±1.0       | 30.3±0.5        | -35.9±0.5         | 14.6±0.1              | 8.6±0.1              | 23.2±0.2            | -12.7±0.6         |
| GLU(-)     | -126.3±2.4      | 57.7±0.9        | -68.6±1.6         | 17.8±0.0              | 8.7±0.1              | 26.5±0.1            | -42.1±1.6         |
| GLY        | -40.3±0.7       | 19.9±0.7        | -20.5±0.0         | 8.9±0.1               | 5.7±0.0              | 14.6±0.1            | -5.9±0.0          |
| HIS        | -61.3±2.9       | 29.0±0.8        | -32.3±2.1         | 14.0±0.5              | 8.3±0.3              | 22.4±0.8            | -9.9±1.3          |
| HIS(+)     | -112.6±5.4      | 52.4±2.6        | -60.2±2.8         | 15.1±0.5              | 9.2±0.2              | 24.3±0.5            | -35.9±2.3         |
| ILE        | -46.6±1.6       | 22.3±1.1        | -24.4±0.5         | 12.1±0.2              | 7.6±0.3              | 19.7±0.4            | -4.7±0.4          |
| LEU        | -45.5±0.8       | 22.6±0.9        | -22.9±0.3         | 11.5±0.1              | 7.2±0.1              | 18.7±0.2            | -4.2±0.1          |
| LYS(+)     | -127.2±0.9      | 58.3±0.5        | -69.0±0.6         | 16.2±0.1              | 9.4±0.2              | 25.6±0.4            | -43.3±0.3         |
| MET        | -47.9±1.1       | 24.0±0.5        | -23.9±0.7         | 11.7±0.2              | 7.2±0.1              | 18.9±0.2            | -5.0±0.6          |
| PHE        | -52.7±0.6       | 26.1±0.4        | -26.6±0.7         | 12.9±0.3              | 8.1±0.1              | 21.0±0.5            | -5.6±0.2          |
| PRO        | -39.2±0.4       | 19.6±0.2        | -19.6±0.3         | 9.9±0.0               | 6.2±0.1              | 16.1±0.1            | -3.5±0.3          |
| SER        | -55.1±4.2       | 25.0±2.1        | -30.0±2.8         | 10.8±0.9              | 6.3±0.3              | 17.1±1.2            | -12.9±1.5         |
| THR        | -50.7±0.2       | 23.1±0.2        | -27.6±0.4         | 11.4±0.0              | 6.9±0.0              | 18.3±0.0            | -9.4±0.4          |
| TRP        | -58.4±4.0       | 29.3±1.8        | -29.1±2.5         | 14.3±0.4              | 8.8±0.2              | 23.0±0.5            | -6.0±2.0          |
| TYR        | -61.5±3.2       | 28.8±1.6        | -32.7±1.7         | 13.7±0.4              | 8.3±0.2              | 22.0±0.5            | -10.7±1.1         |
| VAL        | -44.0±0.6       | 14.4±10.2       | -22.4±0.3         | 10.9±0.2              | 4.6±3.3              | 17.9±0.3            | -3.0±2.2          |
